# Supplementary material for: Asymmetric organic semiconductors for high performance single crystalline field-effect transistors with low activation energy
Source: Royal Society of Chemistry journal article supplement (doi:10.1039/d0tc01122c), 2020-01-01
Supplement: d0tc01122c1.pdf [file d0tc01122c1.pdf]

*Electronic Supplementary Information (ESI)*

## **Asymmetric organic semiconductors for high performance single crystalline field-effect transistors with low activation energy**

Fei Qiu,<sup>‡ab</sup> Yicai Dong,<sup>‡bc</sup> Jie Liu,<sup>b</sup> Yanan Sun,<sup>d</sup> Hua Geng,<sup>d</sup> Hantang Zhang,<sup>\*a</sup> Danlei Zhu,<sup>bc</sup>  
Xiaosong Shi,<sup>bc</sup> Jianghong Liu,<sup>b</sup> Jing Zhang,<sup>bc</sup> Shiyun Ai<sup>\*a</sup> and Lang Jiang<sup>\*bc</sup>

*a. College of Chemistry and Material Science, Shandong Agriculture University, Taian 271000, China.*

*b. Beijing National Laboratory for Molecular Sciences, Key Laboratory of Organic Solids, Institute of Chemistry, Chinese Academy of Sciences, Beijing 100190, China.*

*c. University of the Chinese Academy of Sciences, Beijing 100049*

*d. Department of Chemistry, Capital Normal University, Beijing 100048, China*

<sup>‡</sup>These authors contributed equally to this work.

**Correspondence:** htzhang@sdau.edu.cn; ashy@sdau.edu.cn; ljiang@iccas.ac.cn

## Table of Contents

|                                                                                                  |    |
|--------------------------------------------------------------------------------------------------|----|
| Experimental Section .....                                                                       | 3  |
| Fig. S1 Solution and solid absorption spectra of three compounds .....                           | 5  |
| Fig. S2 Typical transfer, output curves and mobility distribution of thin film transistors ..... | 6  |
| Fig. S3 AFM of thin film of three compounds .....                                                | 7  |
| Fig. S4 XRD of film of 2-phA, 2-phvA and 2-pheA. ....                                            | 8  |
| Fig. S5 Optical microscope and orthogonal polarizing microscope (OPM) picture .....              | 9  |
| Fig. S6 AFM, XRD and TEM for 2-phA and 2-pheA. ....                                              | 10 |
| Table S1. Crystal data and structure refinement for 2-phvA. ....                                 | 11 |
| Fig. S7 AFM of different thickness single crystals and thickness dependence of mobility .....    | 12 |
| Fig. S8 The charge hopping pathways from center molecule to its neighbors .....                  | 13 |
| Table S2 Data of theoretical calculation .....                                                   | 14 |
| Fig. S9 Temperature dependences of charge-carrier mobility .....                                 | 15 |
| Reference .....                                                                                  | 15 |

## Experimental Section

### Modification of substrates

The heavily doped n-type Si wafers with a 300 nm thick SiO<sub>2</sub> layer were used as substrates of OFETs, which were cleaned with deionized water, piranha solution (70/30 vol./vol. H<sub>2</sub>SO<sub>4</sub>/H<sub>2</sub>O<sub>2</sub>), deionized water, isopropanol and blow-dried by N<sub>2</sub>. Then, the substrates were treated with plasma for 5 min at 100 W and modification of octadecyltrichlorosilane (OTS).

### Fabrication of thin film transistors

Bottom-gate top-contact thin film transistors were fabricated on OTS treated SiO<sub>2</sub>/Si. 50nm thin films of three compounds were thermally deposited on the OTS treated SiO<sub>2</sub>/Si. The deposition parameters of three thin films were kept the same (0.1 Å/s for the first 10nm, 0.2 Å/s for the 10-20nm and 0.3 Å/s for the 20-50nm). Then 50nm Au as drain and source electrodes was deposited on thin film under shadow mask with a defined channel length of 30 μm and a width of 215 μm. All the evaporations were conducted under a high vacuum level of 10<sup>-4</sup> Pa. Thin film transistors were characterized by Agilent 1500A.

### Fabrication of single crystals transistors

High quality single crystals were grown on OTS treated SiO<sub>2</sub>/Si substrate by physical vapor transport (PVT) method in a horizontal tube furnace under argon atmosphere. In a tube furnace, 2-phA, 2-phvA and 2-pheA were placed in a quartz boat at the high temperature zone of 125 °C, 120 °C and 145 °C and kept at argon atmosphere at 1 atm, 20 pa and 1 atm, respectively. Single crystals could be obtained on substrate at the low temperature zone. The temperature of the tube furnace was gradually increased to target temperature, then maintained for 2 h. The thin Au electrodes (about 100 nm) were pasted onto the crystals to fabricate the bottom-gate top-contact devices with the help of the mechanical probes.<sup>1</sup> Devices were characterized by Agilent 1500A.

## Material Synthesis

### Synthesis of compound 2-phA

A mixture of compound 2-trifluoromethanesulfonate-anthracene (1 g, 3.07 mmol), (4-hexylphenyl) boronic acid (822 mg, 6.75 mmol) and Pd(PPh<sub>3</sub>)<sub>4</sub> (177 mg, 0.15 mmol) was dissolved in 40 mL 1,4-dioxane under argon. Then 6 mL K<sub>2</sub>CO<sub>3</sub> aqueous solution (2 M) has already bubbled with argon was added. The mixture was stirred for 12 h at 90 °C. The resulting precipitate was collected by filtration and was washed with triethylamine, dichloromethane, water and ethanol in turn. The product was further purified by vapor sublimation. Finally, 0.65 g pure product (2-phA) was obtained as a yellow solid in a yield of 84%. <sup>1</sup>H NMR (300 MHz, CDCl<sub>3</sub>) δ 8.47 (2 H, d, *J* = 10.6), 8.21 (1 H, d, *J* = 0.7), 8.09 (1 H, d, *J* = 8.9), 8.02 (2 H, dd, *J* = 6.5, 3.2), 7.80 (1 H, d, *J* = 1.4), 7.77 (2 H, dd, *J* = 8.4, 2.0), 7.56 - 7.45 (4 H, m), 7.44 - 7.37 (1 H, m). <sup>13</sup>C NMR (75 MHz, CDCl<sub>3</sub>) δ 141.03 (s), 137.78 (s), 132.27 - 131.47 (m), 130.84 (s), 128.83 (d, *J* = 10.8), 128.18 (d, *J* = 5.6), 127.39 (d, *J* = 5.9), 126.56 (s), 126.01 (s), 125.51 (dd, *J* = 11.5, 9.1). MS (EI): *m/z* 254 (M<sup>+</sup>).

## Synthesis of compound 2-phvA

A mixture of compound 2-bromoanthracene (1.0 g, 3.89 mmol), trans-beta-styrylboronic acid pinacol ester (1.16 g, 5.06 mmol) and Pd(PPh<sub>3</sub>)<sub>4</sub> (219 mg, 0.19 mmol) was dissolved in 60 mL toluene under argon. Then 6 mL methanol and 8 mL K<sub>2</sub>CO<sub>3</sub> aqueous solution (2M) has already bubbled with argon was added. The mixture was refluxed for 12 h at 110 °C. After that the mixture was allowed to cool to room temperature. The resulting precipitate was collected by filtration and was washed with dichloromethane, water and ethanol successively. The product was further purified by vapor sublimation. Finally, 0.87 g pure product (2-phvA) was obtained as a yellow solid in a yield of 80%. <sup>1</sup>H NMR (400 MHz, CDCl<sub>3</sub>) δ 8.39 (2 H, d, *J* = 6.3), 7.99 (4 H, d, *J* = 9.4), 7.80 - 7.75 (1 H, m), 7.59 (2 H, d, *J* = 7.5), 7.46 (2 H, dd, *J* = 5.3, 4.1), 7.39 (3 H, dd, *J* = 15.9, 8.0), 7.30 (2 H, d, *J* = 12.8). MS (EI): *m/z* 280 (M<sup>+</sup>). <sup>13</sup>C NMR was not obtained because of 2-phvA was difficult to dissolve.

## Synthesis of compound 2-pheA

A mixture of compound 2-bromoanthracene (1.0 g, 3.89 mmol), phenylacetylene (0.52 g, 5.06 mmol), Pd(PPh<sub>3</sub>)<sub>2</sub>Cl<sub>2</sub> (137 mg, 0.195 mmol) and CuI (74 mg, 0.389 mmol) was dissolved in 60 mL THF under argon. Then triethylamine (1.18g, 11.67 mmol) was added via syringe. The mixture was stirred for 48 h at 70 °C. After that the mixture was allowed to cool to room temperature, and then precipitated. The resulting precipitate was collected by filtration and was washed with dichloromethane, water and ethanol successively. The product was then further purified by vapor sublimation. Finally, 0.90 g pure product (2-pheA) was obtained as a yellow solid in yield of 83%. <sup>1</sup>H NMR (300 MHz, CDCl<sub>3</sub>) 8.40 (2 H, s), 8.23 (1 H, s), 8.07 - 7.93 (3 H, m), 7.61 (2 H, dd, *J* = 7.2, 2.4), 7.54 (1 H, dd, *J* = 8.8, 1.4), 7.49 (2 H, dd, *J* = 6.6, 3.2), 7.43 - 7.34 (3 H, m). <sup>13</sup>C NMR (75 MHz, CDCl<sub>3</sub>) δ 133.87 (s), 134.97 - 130.93 (m), 130.67 (s), 129.21 - 127.27 (m), 127.27 - 127.08 (m), 126.34 (s), 126.28 - 124.60 (m), 123.29 (s), 119.98 (s). MS (EI): *m/z* 278 (M<sup>+</sup>).

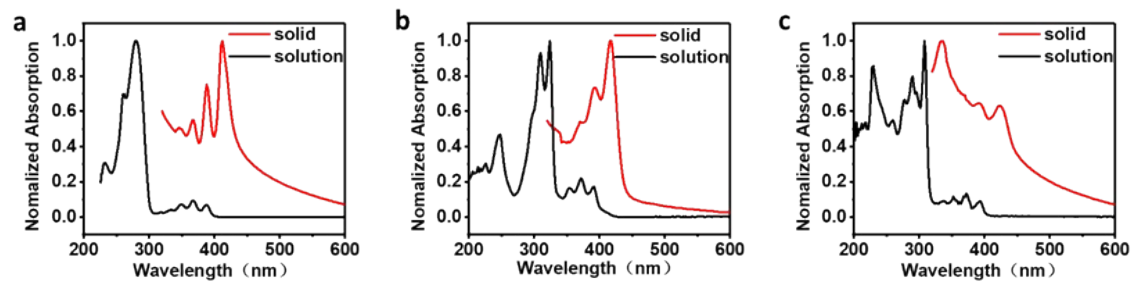

Fig. S1 Solution and solid absorption spectra of 2-phA, 2-phvA and 2-phEA.

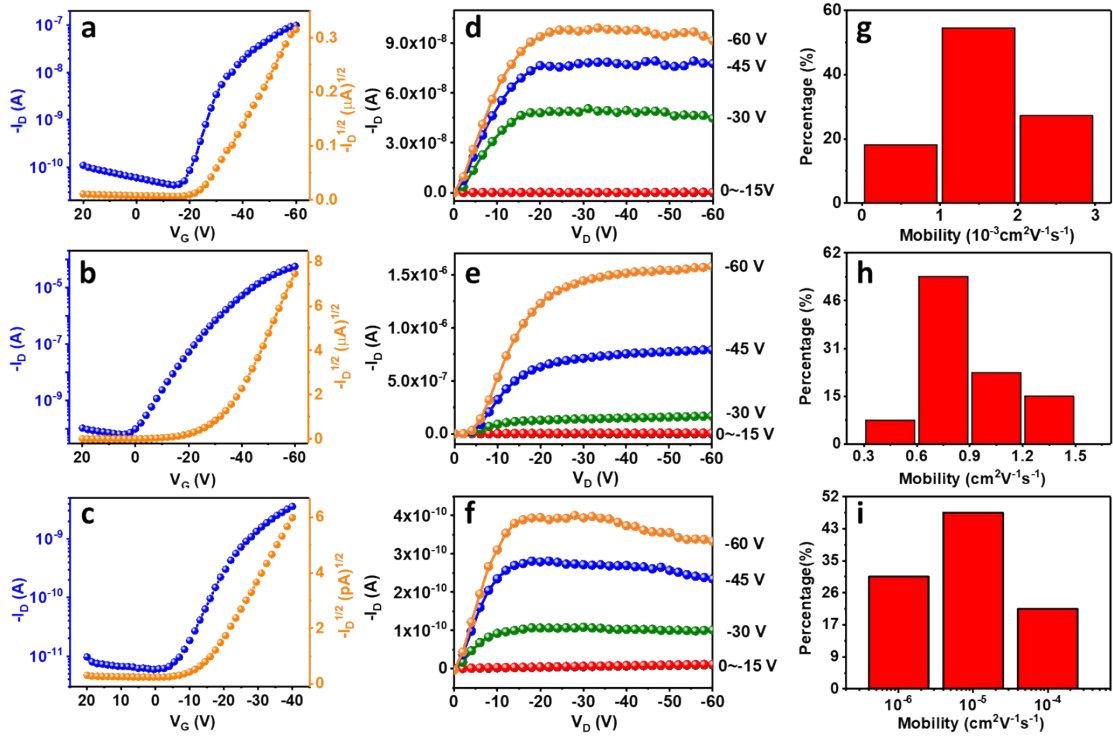

**Fig. S2** Typical transfer (a, b and c), output (d, e and f) curves and mobility distribution (g, h and i) of thin film transistors of 2-phA, 2-phvA and 2-pheA.

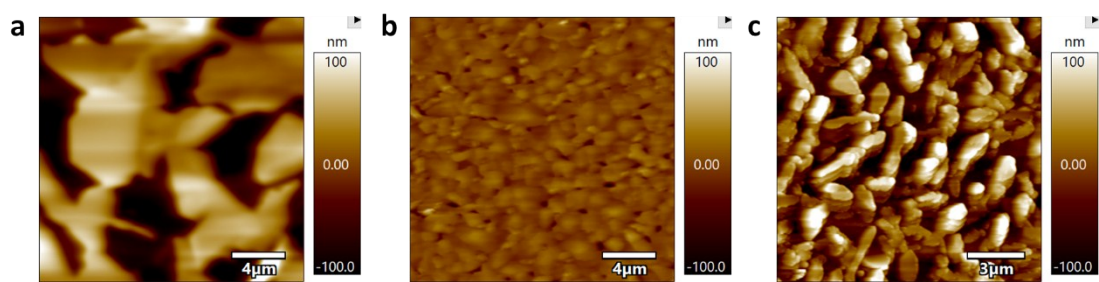

**Fig. S3** AFM of thin film of (a) **2-phA**, (b) **2-phvA** and (c) **2-pheA** with roughness ( $R_q$ ) of 43.1 nm, 10.6 nm and 49.8 nm, respectively.

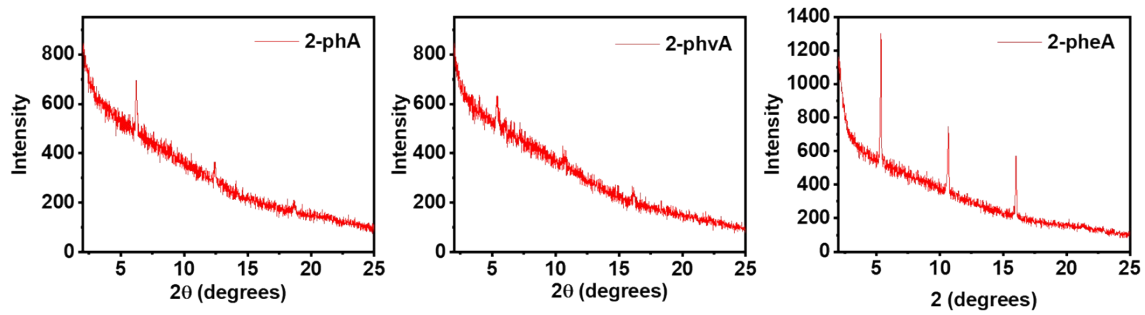

Fig. S4 XRD of film of 2-phA, 2-phvA and 2-pheA.



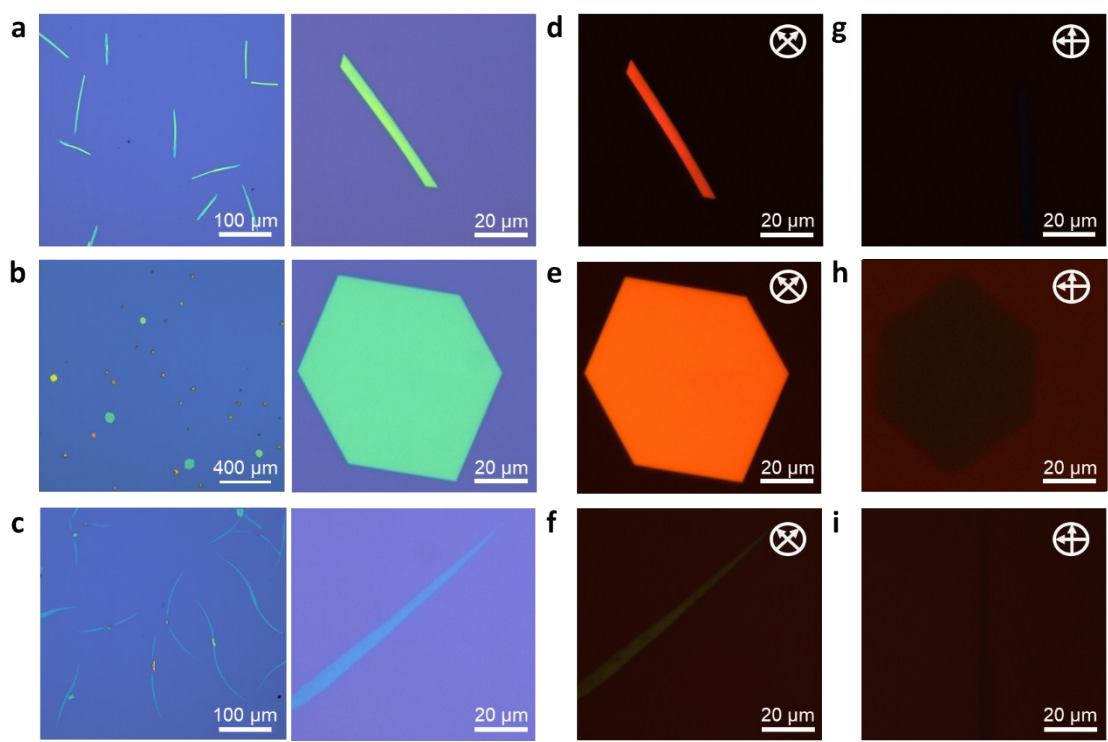

**Fig. S5** (a, b and c) optical microscope and (d-i) orthogonal polarizing microscope (OPM) picture of **2-phA**, **2-phvA** and **2-pheA**.

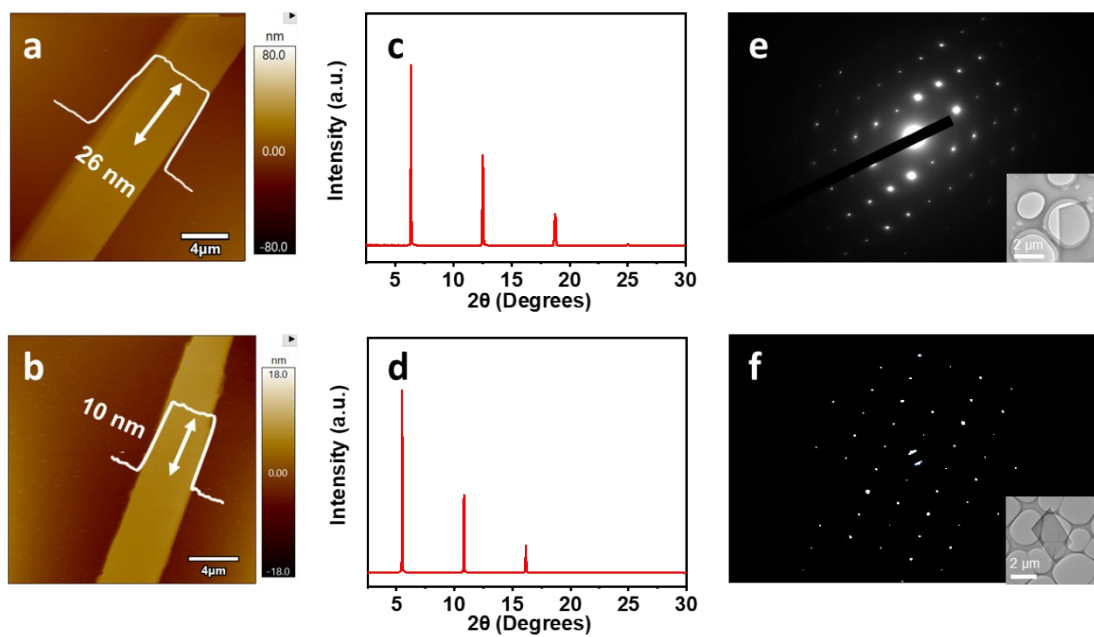

Fig. S6 AFM (a, b), XRD (c, d) and TEM (e, f) for 2-phA and 2-pheA.

**Table S1. Crystal data and structure refinement for 2-phvA**

|                                             |                                                               |
|---------------------------------------------|---------------------------------------------------------------|
| Empirical formula                           | C <sub>44</sub> H <sub>32</sub>                               |
| Formula weight                              | 560.69                                                        |
| Temperature/K                               | 169.99(12)                                                    |
| Crystal system                              | monoclinic                                                    |
| Space group                                 | Pc                                                            |
| a/Å                                         | 5.90880(10)                                                   |
| b/Å                                         | 7.4390(2)                                                     |
| c/Å                                         | 33.1005(8)                                                    |
| α/°                                         | 90                                                            |
| β/°                                         | 90.919(2)                                                     |
| γ/°                                         | 90                                                            |
| Volume/Å <sup>3</sup>                       | 1454.76(6)                                                    |
| Z                                           | 2                                                             |
| ρ <sub>calc</sub> /cm <sup>3</sup>          | 1.28                                                          |
| μ/mm <sup>-1</sup>                          | 0.547                                                         |
| F(000)                                      | 592                                                           |
| Crystal size/mm <sup>3</sup>                | 0.21 × 0.08 × 0.05                                            |
| Radiation                                   | CuKα (λ = 1.54184)                                            |
| 2θ range for data collection/°              | 5.34 to 151.14                                                |
| Index ranges                                | -7 ≤ h ≤ 7, -9 ≤ k ≤ 9, -41 ≤ l ≤ 41                          |
| Reflections collected                       | 25929                                                         |
| Independent reflections                     | 5488 [R <sub>int</sub> = 0.0484, R <sub>sigma</sub> = 0.0379] |
| Data/restraints/parameters                  | 5488/2/397                                                    |
| Goodness-of-fit on F <sup>2</sup>           | 1.086                                                         |
| Final R indexes [I > 2σ (I)]                | R <sub>1</sub> = 0.0649, wR <sub>2</sub> = 0.1723             |
| Final R indexes [all data]                  | R <sub>1</sub> = 0.0766, wR <sub>2</sub> = 0.1800             |
| Largest diff. peak/hole / e Å <sup>-3</sup> | 0.36/-0.27                                                    |
| Flack parameter                             | -1.2(10)                                                      |

In our cases, for 2-phA and 2-phvA, the mobility increases with the increase of crystal thickness in the range of 10-30 nm and reach its maximum in the range of 20-30 nm. Then it goes down when the crystal thickness is more than 20-30 nm (Fig. S7a-h, ESI<sup>+</sup>). For 2-pheA, only crystals with a thickness less than 10 nm can be obtained (it easily grows into twin crystals if the thickness is more than 10 nm), and an increase of the mobility is observed as increase of the thickness of the crystals (Fig. S7i-l, ESI<sup>+</sup>). Therefore, to ensure the best device performances, crystals with the thickness of 20-30 nm (2-phA and 2-phvA) and 10 nm (2-pheA) were selected to fabricate the single crystal OFETs.

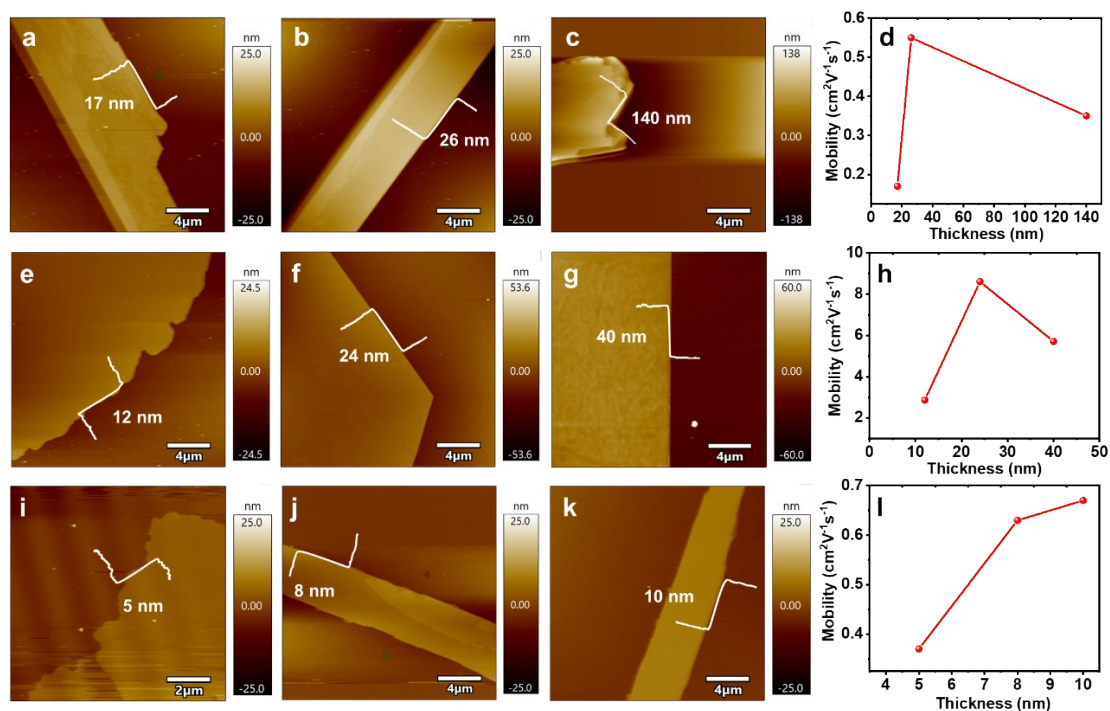

**Fig. S7** AFM of different thickness single crystals and thickness dependence of mobility for (a-d) **2-phA**, (e-h) **2-phvA** and (i-l) **2-pheA**.

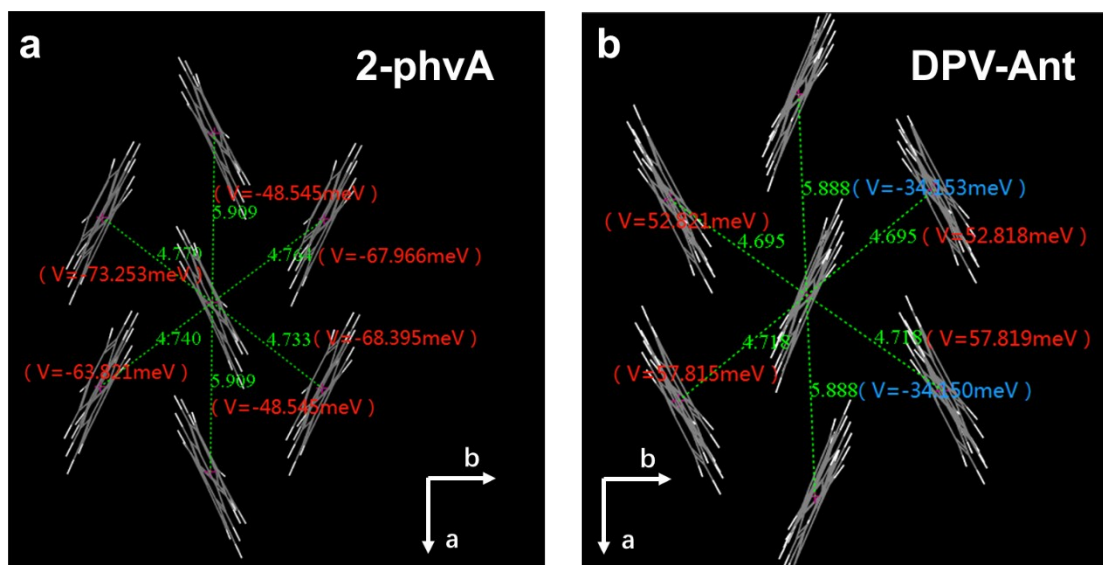

Fig. S8 The charge hopping pathways from center molecule to its neighbors for (a) **2-phvA** and (b) **DPV-Ant**.

**Table S2 Data of theoretical calculation**

|                                                                              | <b>DPV-Ant</b>         | <b>2-phvA</b>           |
|------------------------------------------------------------------------------|------------------------|-------------------------|
| Recombination energy<br>(meV)                                                | 160.47                 | 156.49                  |
| Transfer integral (meV)                                                      | 57.82                  | 73.25                   |
| Mobility of single<br>crystals ( $\text{cm}^2 \text{V}^{-1} \text{s}^{-1}$ ) | 1.75 (Calculated data) | 24.07 (Calculated data) |

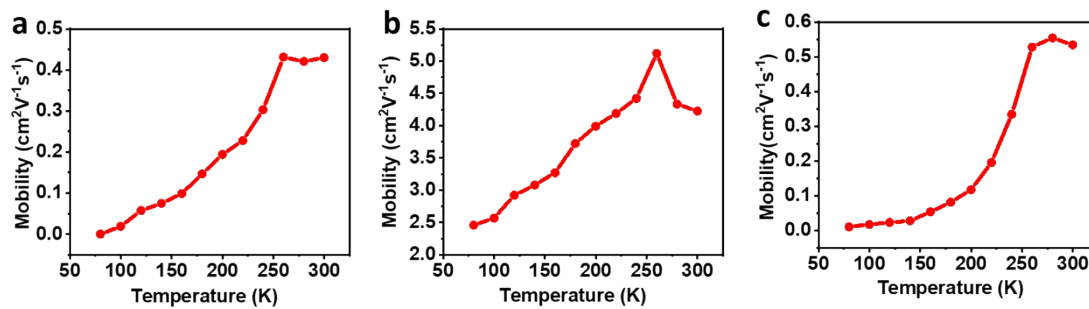

Fig. S9 Temperature dependences of charge-carrier mobility (a, b and c) for **2-phA**, **2-phvA** and **2-phA**.

## Reference

1. L. Jiang, J. Liu, Y. Shi, D. Zhu, H. Zhang, Y. Hu, J. Yu, W. Hu and L. Jiang, *J. Mater. Chem. C*, 2019, 7, 3436-3442.
